# Supplementary material for: Surgical site infection after gastrointestinal surgery in children: an international, multicentre, prospective cohort study
Source: PubMed Central journal article supplement (PMC7716674; doi:10.1136/bmjgh-2020-003429), 2020-12-03
Supplement: bmjgh-2020-003429supp001.pdf [file bmjgh-2020-003429supp001.pdf]

## Supplementary Tables

Table S1 – Pathology by HDI

|                                                                     | High HDI (n =<br>523) | Middle HDI (n<br>= 397) | Low HDI (n =<br>239) | Total<br>(n = 1159) |
|---------------------------------------------------------------------|-----------------------|-------------------------|----------------------|---------------------|
| K35 Appendicitis                                                    | 438 (83.7)            | 281 (70.8)              | 101 (42.3)           | 820 (70.8)          |
| Q43 Congenital: Other                                               | 26 (5.0)              | 32 (8.1)                | 65 (27.2)            | 123 (10.6)          |
| K561 Intestinal obstruction: Intussusception                        | 6 (1.1)               | 11 (2.8)                | 17 (7.1)             | 34 (2.9)            |
| K80 Cholelithiasis / cholecystitis (gallstones)                     | 14 (2.7)              | 11 (2.8)                | 1 (0.4)              | 26 (2.2)            |
| Q431 Hirschsprung's disease                                         | 2 (0.4)               | 5 (1.3)                 | 9 (3.8)              | 16 (1.4)            |
| D13 Neoplasm: any benign                                            | 1 (0.2)               | 9 (2.3)                 | 4 (1.7)              | 14 (1.2)            |
| 00 No disease identified                                            | 1 (0.2)               | 10 (2.5)                | 0 (0.0)              | 11 (0.9)            |
| Q430 Congenital: Meckel diverticulum                                | 6 (1.1)               | 2 (0.5)                 | 3 (1.3)              | 11 (0.9)            |
| K562 Intestinal obstruction: Volvulus                               | 2 (0.4)               | 3 (0.8)                 | 4 (1.7)              | 9 (0.8)             |
| A01 Infection, Typhoid / paratyphoid                                | 1 (0.2)               | 0 (0.0)                 | 7 (2.9)              | 8 (0.7)             |
| K565 Intestinal obstruction: Adhesions                              | 4 (0.8)               | 2 (0.5)                 | 2 (0.8)              | 8 (0.7)             |
| Q793 Congenital: Gastroschisis                                      | 2 (0.4)               | 4 (1.0)                 | 2 (0.8)              | 8 (0.7)             |
| Y83 Complication of previous surgical operation / procedure         | 2 (0.4)               | 0 (0.0)                 | 6 (2.5)              | 8 (0.7)             |
| K52 Colitis/gastroenteritis: Other noninfective inc. ischemic bowel | 2 (0.4)               | 4 (1.0)                 | 1 (0.4)              | 7 (0.6)             |
| C26 Neoplasm: any malignant (cancer)                                | 1 (0.2)               | 3 (0.8)                 | 2 (0.8)              | 6 (0.5)             |
| K46 Hernia: any abdominal hernia                                    | 1 (0.2)               | 2 (0.5)                 | 2 (0.8)              | 5 (0.4)             |
| K51 Colitis/gastroenteritis: Ulcerative colitis                     | 4 (0.8)               | 1 (0.3)                 | 0 (0.0)              | 5 (0.4)             |
| S31 Trauma: penetrating                                             | 0 (0.0)               | 3 (0.8)                 | 2 (0.8)              | 5 (0.4)             |
| 99 Other diagnosis (please specify; please try to avoid using)      | 2 (0.4)               | 0 (0.0)                 | 2 (0.8)              | 4 (0.3)             |
| A49 Infection: other                                                | 0 (0.0)               | 1 (0.3)                 | 3 (1.3)              | 4 (0.3)             |
| K50 Colitis/gastroenteritis: Crohns disease                         | 3 (0.6)               | 1 (0.3)                 | 0 (0.0)              | 4 (0.3)             |
| S38 Trauma: non-penetrating / blunt                                 | 0 (0.0)               | 2 (0.5)                 | 2 (0.8)              | 4 (0.3)             |
| A09 Infection, Other infectious gastroenteritis / colitis           | 1 (0.2)               | 0 (0.0)                 | 2 (0.8)              | 3 (0.3)             |
| K55 Bleeding: small bowel / colon with no malignancy                | 0 (0.0)               | 3 (0.8)                 | 0 (0.0)              | 3 (0.3)             |
| K85 Acute pancreatitis                                              | 3 (0.6)               | 0 (0.0)                 | 0 (0.0)              | 3 (0.3)             |
| E66 Obesity                                                         | 0 (0.0)               | 2 (0.5)                 | 0 (0.0)              | 2 (0.2)             |
| K275 Peptic ulcer: perforation                                      | 1 (0.2)               | 1 (0.3)                 | 0 (0.0)              | 2 (0.2)             |
| T54 Toxic effect of corrosive substances                            | 0 (0.0)               | 0 (0.0)                 | 2 (0.8)              | 2 (0.2)             |
| K631 Perforation of intestine                                       | 0 (0.0)               | 1 (0.3)                 | 0 (0.0)              | 1 (0.1)             |
| K631 Stercoral perforation of colon                                 | 0 (0.0)               | 1 (0.3)                 | 0 (0.0)              | 1 (0.1)             |
| K831 Perforation of bile duct                                       | 0 (0.0)               | 1 (0.3)                 | 0 (0.0)              | 1 (0.1)             |
| Missing                                                             | 0 (0.0)               | 1 (0.3)                 | 0 (0.0)              | 1 (0.1)             |

Pathology is categorized into ICD10 codes. Number of patients undergoing a surgery for a specific pathology is presented as number of patients (%).

**Table S2 – Procedures by HDI**

|                                                        | High HDI<br>(n = 523) | Middle HDI<br>(n = 397) | Low HDI<br>(n = 239) | Total<br>(n = 1159) |
|--------------------------------------------------------|-----------------------|-------------------------|----------------------|---------------------|
| H01 Appendix: Emergency excision of appendix           | 442 (84.5)            | 286 (72.0)              | 104 (43.5)           | 832 (71.8)          |
| G58 Small bowel: Excision of small bowel               | 21 (4.0)              | 16 (4.0)                | 21 (8.8)             | 58 (5.0)            |
| H15 Colon: Formation of any colonic stoma              | 7 (1.3)               | 7 (1.8)                 | 23 (9.6)             | 37 (3.2)            |
| G67 Small bowel: Other open operations on small bowel  | 9 (1.7)               | 17 (4.3)                | 10 (4.2)             | 36 (3.1)            |
| H46 Rectum: Other open operations on rectum            | 2 (0.4)               | 8 (2.0)                 | 24 (10.0)            | 34 (2.9)            |
| J18 Gallbladder: Excision of gall bladder              | 16 (3.1)              | 12 (3.0)                | 2 (0.8)              | 30 (2.6)            |
| H19 Colon: Other open operations on colon              | 4 (0.8)               | 7 (1.8)                 | 13 (5.4)             | 24 (2.1)            |
| H11 Colon: Other excision of colon                     | 2 (0.4)               | 13 (3.3)                | 5 (2.1)              | 20 (1.7)            |
| H07 Colon: Excision of right hemicolon                 | 2 (0.4)               | 4 (1.0)                 | 8 (3.3)              | 14 (1.2)            |
| G70 Small bowel: Excision of Meckels diverticulum      | 5 (1.0)               | 3 (0.8)                 | 3 (1.3)              | 11 (0.9)            |
| H10 Colon: Excision of sigmoid colon                   | 2 (0.4)               | 5 (1.3)                 | 2 (0.8)              | 9 (0.8)             |
| T281 Abdomen: Closure of gastroschisis/exomphalos      | 2 (0.4)               | 5 (1.3)                 | 2 (0.8)              | 9 (0.8)             |
| G74 Small bowel: Formation of ileostomy                | 0 (0.0)               | 2 (0.5)                 | 5 (2.1)              | 7 (0.6)             |
| G536 Duodenum: Correction of malrotation               | 1 (0.2)               | 0 (0.0)                 | 5 (2.1)              | 6 (0.5)             |
| H09 Colon: Excision of left hemicolon                  | 2 (0.4)               | 2 (0.5)                 | 2 (0.8)              | 6 (0.5)             |
| H33 Rectum: Excision of rectum                         | 2 (0.4)               | 1 (0.3)                 | 3 (1.3)              | 6 (0.5)             |
| G28 Stomach: Partial excision of stomach               | 0 (0.0)               | 4 (1.0)                 | 1 (0.4)              | 5 (0.4)             |
| H05 Colon: Total excision of colon                     | 1 (0.2)               | 3 (0.8)                 | 1 (0.4)              | 5 (0.4)             |
| H06 Colon: Extended excision of right hemicolon        | 1 (0.2)               | 0 (0.0)                 | 4 (1.7)              | 5 (0.4)             |
| H04 Colon: Total excision of colon and rectum          | 2 (0.4)               | 1 (0.3)                 | 0 (0.0)              | 3 (0.3)             |
| G32 Stomach: Connection of stomach to jejunum          | 0 (0.0)               | 0 (0.0)                 | 1 (0.4)              | 1 (0.1)             |
| J23 Gallbladder: Other open operations on gall bladder | 0 (0.0)               | 1 (0.3)                 | 0 (0.0)              | 1 (0.1)             |

Procedures are categorized into OPCS4 codes. Number of patients undergoing a specific procedure is presented as number of patients (%).

**Table S3 - SSI by contamination and HDI**

| HDI tertile | Intraoperative contamination | No SSI (n = 1016) | SSI Present (n = 143) |
|-------------|------------------------------|-------------------|-----------------------|
| High        | Clean-contaminated           | 335 (96.5)        | 12 (3.5)              |
|             | Contaminated/Dirty           | 152 (88.4)        | 20 (11.6)             |
|             | Unknown                      | 3 (75.0)          | 1 (25.0)              |
| Middle      | Clean-contaminated           | 285 (90.8)        | 29 (9.2)              |
|             | Contaminated/Dirty           | 60 (74.1)         | 21 (25.9)             |
|             | Unknown                      | 1 (50.0)          | 1 (50.0)              |
| Low         | Clean-contaminated           | 130 (82.8)        | 27 (17.2)             |
|             | Contaminated/Dirty           | 50 (61.0)         | 32 (39.0)             |
|             | Unknown                      | 0 (0.0)           | 0 (0.0)               |

HDI – Human Development Index, SSI – Surgical Site Infection. Data are presented as n (%).

**Table S4 - SSI Model**

| Dependent: SSI                    |                           | No            | Yes           | OR (univariable)             | OR (multilevel)               |
|-----------------------------------|---------------------------|---------------|---------------|------------------------------|-------------------------------|
| HDI tertile                       | High                      | 490<br>(93.7) | 33 (6.3)      | -                            | -                             |
|                                   | Middle                    | 346<br>(87.2) | 51<br>(12.8)  | 2.19 (1.39-3.49,<br>p=0.001) | 2.09 (1.09-4.03,<br>p=0.027)  |
|                                   | Low                       | 180<br>(75.3) | 59<br>(24.7)  | 4.87 (3.10-7.77,<br>p<0.001) | 3.45 (1.68-7.12,<br>p=0.001)  |
| Age                               | Adolescent (12 to <16 y)  | 402<br>(92.2) | 34 (7.8)      | -                            | -                             |
|                                   | Infant/Child (0 to <12 y) | 614<br>(84.9) | 109<br>(15.1) | 2.10 (1.41-3.19,<br>p<0.001) | 1.53 (0.91-2.57,<br>p=0.108)  |
| Gender                            | Male                      | 591<br>(88.2) | 79<br>(11.8)  | -                            | -                             |
|                                   | Female                    | 397<br>(86.3) | 63<br>(13.7)  | 1.19 (0.83-1.69,<br>p=0.343) | 1.30 (0.86-1.97,<br>p=0.216)  |
| ASA grade                         | 1                         | 786<br>(90.2) | 85 (9.8)      | -                            | -                             |
|                                   | 2                         | 138<br>(76.7) | 42<br>(23.3)  | 2.81 (1.85-4.23,<br>p<0.001) | 1.64 (0.97-2.76,<br>p=0.063)  |
|                                   | 3+                        | 54<br>(81.8)  | 12<br>(18.2)  | 2.05 (1.01-3.87,<br>p=0.034) | 0.95 (0.42-2.13,<br>p=0.903)  |
| Intraoperative contamination      | Clean-contaminated        | 750<br>(91.7) | 68 (8.3)      | -                            | -                             |
|                                   | Contaminated              | 121<br>(76.1) | 38<br>(23.9)  | 3.46 (2.21-5.36,<br>p<0.001) | 3.57 (2.10-6.07,<br>p<0.001)  |
|                                   | Dirty                     | 141<br>(80.1) | 35<br>(19.9)  | 2.74 (1.74-4.25,<br>p<0.001) | 4.09 (2.35-7.13,<br>p<0.001)  |
| Pathology                         | Appendicitis              | 746<br>(91.0) | 74 (9.0)      | -                            | -                             |
|                                   | Congenital                | 116<br>(73.4) | 42<br>(26.6)  | 3.65 (2.37-5.57,<br>p<0.001) | 1.74 (0.94-3.23,<br>p=0.080)  |
|                                   | Colitis                   | 7 (87.5)      | 1 (12.5)      | 1.44 (0.08-8.25,<br>p=0.735) | 1.06 (0.11-10.53,<br>p=0.958) |
|                                   | Other                     | 147<br>(85.0) | 26<br>(15.0)  | 1.78 (1.09-2.85,<br>p=0.018) | 0.93 (0.50-1.73,<br>p=0.822)  |
| WHO Checklist Use                 | No, not available         | 196<br>(84.1) | 37<br>(15.9)  | -                            | -                             |
|                                   | No, but available         | 147<br>(84.0) | 28<br>(16.0)  | 1.01 (0.59-1.72,<br>p=0.974) | 0.74 (0.33-1.65,<br>p=0.457)  |
|                                   | Yes                       | 654<br>(89.3) | 78<br>(10.7)  | 0.63 (0.42-0.97,<br>p=0.033) | 0.94 (0.46-1.94,<br>p=0.876)  |
| Antibiotics: pre- or prophylactic | No                        | 138<br>(94.5) | 8 (5.5)       | -                            | -                             |
|                                   | Yes                       | 869<br>(86.8) | 132<br>(13.2) | 2.62 (1.34-5.93,<br>p=0.010) | 1.89 (0.78-4.62,<br>p=0.160)  |
| Operative approach                | Open                      | 669<br>(84.0) | 127<br>(16.0) | -                            | -                             |

|              |               |          |                              |                              |
|--------------|---------------|----------|------------------------------|------------------------------|
| Laparoscopic | 347<br>(95.6) | 16 (4.4) | 0.24 (0.14-0.40,<br>p<0.001) | 0.43 (0.22-0.84,<br>p=0.013) |
|--------------|---------------|----------|------------------------------|------------------------------|

Number in model = 1061, Number of groups = 172, AIC = 706.8, C-statistic = 0.825

HDI – Human Development Index, OR – Odds Ratio, ASA – American Society of Anesthesiologists', y – Years, WHO – World Health Organisation. Data are presented as n (%) and odds ratios (OR) alongside the corresponding (95% confidence interval).

**Table S5 - Organisms cultured by HDI**

|                                         | High HDI<br>(n = 15) | Middle HDI<br>(n = 9) | Low HDI<br>(n = 25) | Total<br>(n = 49) |
|-----------------------------------------|----------------------|-----------------------|---------------------|-------------------|
| Coliform                                | 5 (33.3)             | 2 (22.2)              | 16 (64.0)           | 23 (46.9)         |
| Staphylococcus Aureus                   | 2 (13.3)             | 4 (44.4)              | 5 (20.0)            | 11 (22.4)         |
| Other organism                          | 3 (20.0)             | 1 (11.1)              | 1 (4.0)             | 5 (10.2)          |
| Anaerobe                                | 1 (6.7)              | 1 (11.1)              | 0 (0.0)             | 2 (4.1)           |
| Anaerobe+Coliform                       | 2 (13.3)             | 0 (0.0)               | 0 (0.0)             | 2 (4.1)           |
| Pseudomonas                             | 1 (6.7)              | 0 (0.0)               | 1 (4.0)             | 2 (4.1)           |
| Anaerobe+Coliform+Pseudomonas           | 0 (0.0)              | 1 (11.1)              | 0 (0.0)             | 1 (2.0)           |
| Anaerobe+Coliform+Staphylococcus Aureus | 0 (0.0)              | 0 (0.0)               | 1 (4.0)             | 1 (2.0)           |
| Coliform+Staphylococcus Aureus          | 0 (0.0)              | 0 (0.0)               | 1 (4.0)             | 1 (2.0)           |
| Streptococci Species                    | 1 (6.7)              | 0 (0.0)               | 0 (0.0)             | 1 (2.0)           |

HDI – Human Development Index. Data are presented as n (%).
